# Supplementary material
Source: PubMed Central journal article supplement (PMC3669137)
Supplement: auto-5-816-s01.pdf [file auto-5-816-s01.pdf]

## **Supplemental Material to:**

**Hua Zhu, Hao Wu, Xiuping Liu, Biao Li, Yun Chen,  
Xingcong Ren, Chang-Gong Liu and Jin-Ming Yang**

**Regulation of autophagy by a *beclin 1*-targeted microRNA,  
miR-30a, in cancer cells**

**Autophagy 2009; 5(6)**

**[www.landesbioscience.com/journals/autophagy/article/9064](http://www.landesbioscience.com/journals/autophagy/article/9064)**

Figure S1

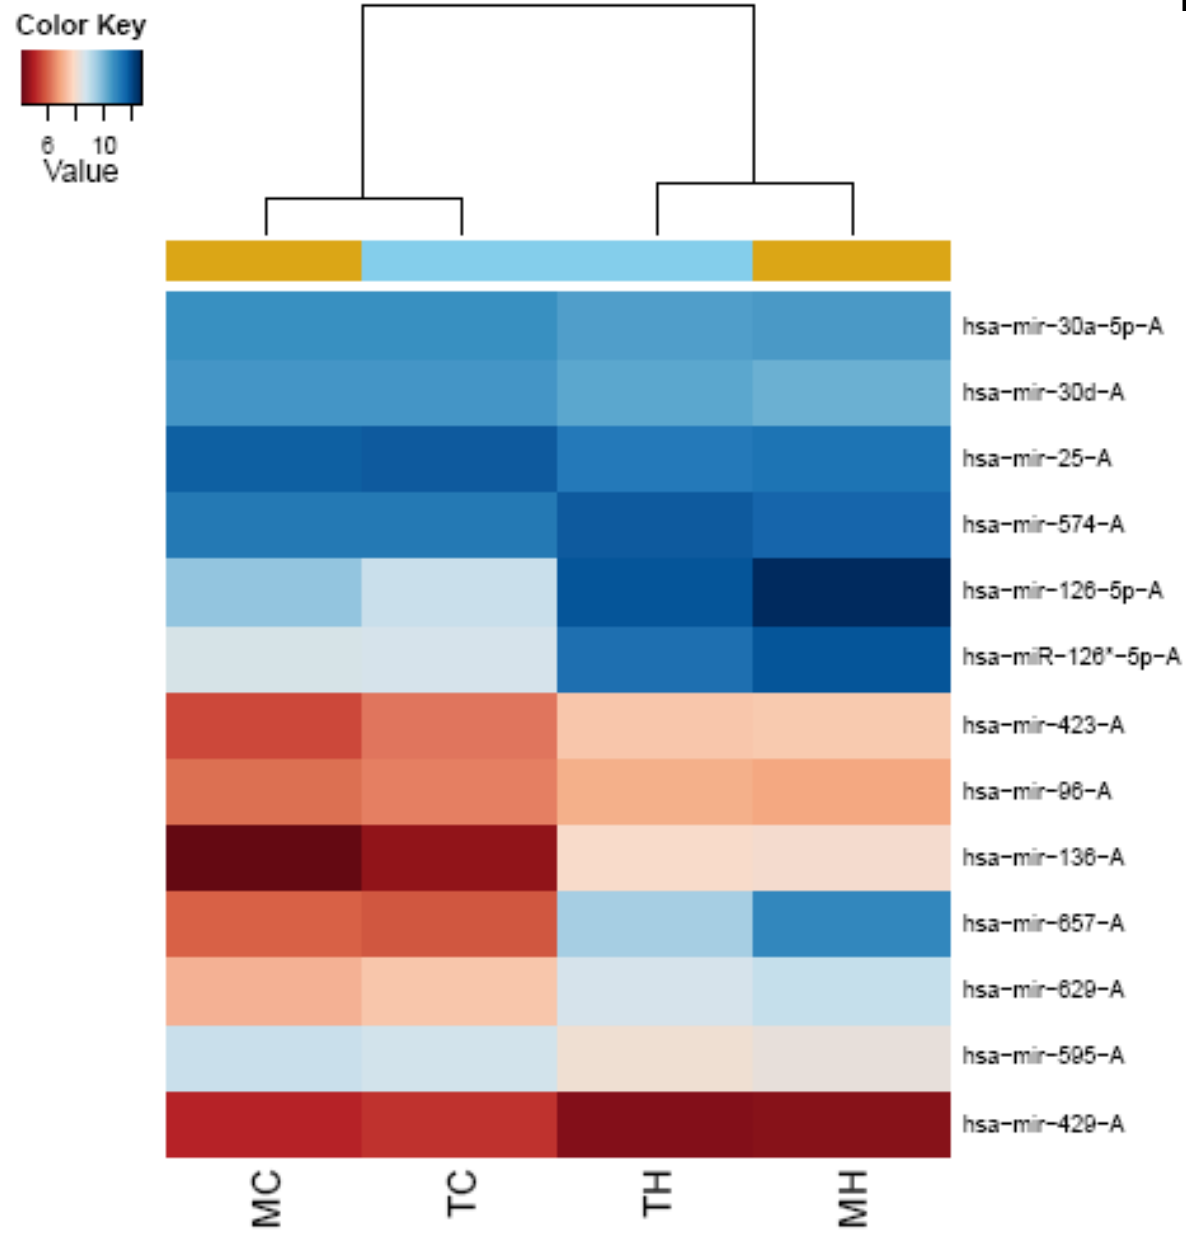

**Figure S1. Heat map of miRNAs expression profiles of the samples subjected to nutrient deprivation.** Total RNAs from the treated cells were extracted using the TriZol Reagent, and 5 µg of total RNA from each sample was biotin-labeled by reverse transcription using 5' biotin end-labeled random octomer oligo primer. Hybridization of biotin-labeled cDNA was carried out on miRNA microarray chip (OSU version 4.0, The Ohio State University, Columbus, OH), which contains 1600 miRNA oligo probes derived from 474 human and 373 mouse miRNA genes and printed in duplicates. Hybridization signals were detected by biotin binding of a Streptavidin–Alexa 647 conjugate using an Axon Scanner 4000B (Axon Instrument Inc., CA). The images were quantified using the GenePix 6.0 software (Axon Instrument Inc., CA). All analyses were carried out in R-Project (<http://www.r-project.org>) and BioConductor (<http://www.bioconductor.org>). Background adjustment was achieved by subtracting local median intensities from probe intensities. For the current analysis, only human active miRNA oligo probes with intensities at least 2 were considered. Replicated probes for the same miRNA were averaged and microarrays were normalized. Probe intensities were scaled on the log base 2 for statistical analysis. In the gene filter stage, probes with low variability across all arrays were removed and only probes with transformed values larger than  $\log_2(100)$  in at least 20 percent arrays and interquartile range more than 0.5 were retained, and this led to 133 probes for comparison. MC: MDA-MB-468 untreated control; TC: T98G untreated control; TH: T98G treated with HBSS; MH: MDA-MB-468 treated with HBSS.

Table S1. Alterations of miRNAs expression following nutrient depletion (numbers shown are percent change of each miRNA in cells treated with HBSS versus control)

| ID                | MDA-MB-468 | T98G | P-value     |
|-------------------|------------|------|-------------|
| hsa-mir-136-A     | 1431       | 870  | 0.005745852 |
| hsa-miR-126*-5p-A | 812        | 556  | 0.005916885 |
| hsa-mir-25-A      | -26        | -34  | 0.018463077 |
| hsa-mir-429-A     | -34        | -46  | 0.021818949 |
| hsa-mir-629-A     | 253        | 123  | 0.023754234 |
| hsa-mir-657-A     | 2925       | 1099 | 0.028652043 |
| hsa-mir-126-5p-A  | 635        | 664  | 0.030104793 |
| hsa-mir-30d-A     | -26        | -19  | 0.031463771 |
| hsa-mir-595-A     | -33        | -34  | 0.031537263 |
| hsa-mir-96-A      | 66         | 58   | 0.03323258  |
| hsa-mir-30a-5p-A  | -12        | -15  | 0.034981848 |
| hsa-mir-574-A     | 33         | 53   | 0.039253563 |
| hsa-mir-423-A     | 282        | 126  | 0.043124315 |
